# Supplementary material for: Efficacy and Safety of XEN1101, a Novel Potassium Channel Opener, in Adults With Focal Epilepsy: A Phase 2b Randomized Clinical Trial
Source: PubMed Central journal article supplement — JAMA Neurol. 2023 Oct 9;80(11):1145–54. doi: 10.1001/jamaneurol.2023.3542 (PMC10562989; doi:10.1001/jamaneurol.2023.3542), 2023-10-09
Supplement: jamaneurol-e233542-s002.pdf [file jamaneurol-e233542-s002.pdf]

## Data Sharing Statement

French. Efficacy and Safety of XEN1101, a Novel Potassium Channel Opener, in Adults With Focal Epilepsy. *JAMA Neurol.* Published October 09, 2023. doi:10.1001/jamaneurol.2023.3542

### Data

**Data available:** No
